# Supplementary material
Source: PubMed Central journal article supplement (PMC3553817)
Supplement: IAI.00858-12_zii999099996so1.pdf [file IAI.00858-12_zii999099996so1.pdf]

## Supplementary material

**Table S1.** Primers used in this study

| Name               | Sequence (5'-3')*                       | Usage                                           |
|--------------------|-----------------------------------------|-------------------------------------------------|
| $\Delta$ hpn1      | TTAAACGGCATTAAATCC                      | Construction of $\Delta$ hpn::cat mutant        |
| $\Delta$ hpn2      | atccacttttcaatctatATCGATGACTCCTTTGATTAA | Construction of $\Delta$ hpn::cat mutant        |
| $\Delta$ hpn3      | cccagtttgcgcactgaTAATATCGGTGTGGCTAGGG   | Construction of $\Delta$ hpn::cat mutant        |
| $\Delta$ hpn4      | CCAACGAGTTTATTAGGC                      | Construction of $\Delta$ hpn::cat mutant        |
| $\Delta$ hpn-like1 | TCCTCATATTATACCTTAAAAAGG                | Construction of $\Delta$ hpn-like::aphA3 mutant |
| $\Delta$ hpn-like2 | gtataacatagatcgacTGATGACTCCTTTAATTG     | Construction of $\Delta$ hpn-like::aphA3 mutant |
| $\Delta$ hpn-like3 | gaattgttttagtacctagTGATTGGGGCGTTTGTGGG  | Construction of $\Delta$ hpn-like::aphA3 mutant |
| $\Delta$ hpn-like4 | CCGCATCAAATACGCAAGAC                    | Construction of $\Delta$ hpn-like::aphA3 mutant |

\* Upper case letters indicate *H. pylori*-derived sequences; *aphA3*-or *cat*-specific sequences are in lower case letters. All primers were purchased from Integrated DNA Technology (IDT), Coralville, IA.

**Table S2.** Ni-free and Ni-supplemented defined mouse chow formula.

| <b>Ni-free diet</b>         |                                                  |                                                   |                                          |
|-----------------------------|--------------------------------------------------|---------------------------------------------------|------------------------------------------|
| <b>#</b>                    | <b>Ingredient</b>                                | <b>Provider and Reference</b>                     | <b>Quantity<br/>(g/kg of mouse chow)</b> |
| 1                           | EDTA-treated Casein ES12                         | Casein: Covance#09551, EDTA treated               | 150.0                                    |
| 2                           | L-Cystine                                        | Harlan Laboratories                               | 2.0                                      |
| 3                           | Corn Starch                                      | Harlan Laboratories                               | 275.499                                  |
| 4                           | Hi-maize® 220 (Resistant Starch)                 | Corn Products International, Bridgewater, NJ      | 150.0                                    |
| 5                           | Hi-maize®260 (Resistant Starch)                  | Corn Products International, Bridgewater, NJ      | 75.0                                     |
| 6                           | Maltodextrin                                     | Harlan Laboratories                               | 150.0                                    |
| 7                           | Sucrose                                          | Harlan Laboratories                               | 107.725                                  |
| 8                           | Lard                                             | Harlan Laboratories                               | 35.0                                     |
| 9                           | Soybean Oil                                      | Harlan Laboratories                               | 15.0                                     |
| 10                          | Calcium Carbonate, Ultra-Pure (99.997%)          | Alfa Aesar #43073                                 | 12.495                                   |
| 11                          | Potassium Phosphate, Ultra-Pure (99.999%)        | Alfa Aesar #10840                                 | 6.86                                     |
| 12                          | Potassium Citrate, monohydrate                   | Harlan Laboratories                               | 2.477                                    |
| 13                          | Sodium Chloride, Ultra-Pure (99.999%)            | Alfa Aesar #10862                                 | 2.59                                     |
| 14                          | Potassium Sulfate, Ultra-Pure (99.997%)          | Alfa Aesar #10845                                 | 1.631                                    |
| 15                          | Magnesium Oxide, Ultra-Pure (99.998%)            | Alfa Aesar #10800                                 | 0.851                                    |
| 16                          | Ferric Citrate                                   | Harlan Labs, supplied by GFS Chemicals, inc #1181 | 0.212                                    |
| 17                          | Zinc Oxide, Ultra-Pure (99.999%)                 | Alfa Aesar #11137                                 | 0.044                                    |
| 18                          | Manganese Oxide, Ultra Pure (99.999%)            | Alfa Aesar #10805                                 | 0.022                                    |
| 19                          | Copper Chloride, dihydrate, Ultra-Pure (99.999%) | Alfa Aesar #10698                                 | 0.016                                    |
| 20                          | Potassium Iodate                                 | Harlan Laboratories                               | 0.0004                                   |
| 21                          | Sodium Selenate                                  | Harlan Laboratories                               | 0.0004                                   |
| 22                          | Ammonium Paramolybdate, tetrahydrate             | Harlan Laboratories                               | 0.0003                                   |
| 23                          | Sodium Meta-Silicate, nonahydrate                | Harlan Laboratories                               | 0.0004                                   |
| 24                          | Chromium Potassium Sulfate, dodecahydrate        | Harlan Laboratories                               | 0.0096                                   |
| 25                          | Lithium Chloride                                 | Harlan Laboratories                               | 0.0006                                   |
| 26                          | Boric Acid                                       | Harlan Laboratories                               | 0.0029                                   |
| 27                          | Sodium Fluoride                                  | Harlan Laboratories                               | 0.0022                                   |
| 28                          | Ammonium Meta-Vanadate                           | Harlan Laboratories                               | 0.0002                                   |
| 29                          | Vitamin Mix, AIN-93-VX (94047)                   | Harlan Laboratories                               | 10                                       |
| 30                          | Choline Bitartrate                               | Harlan Laboratories                               | 2.5                                      |
| 31                          | TBHQ, antioxidant                                | Harlan Laboratories                               | 0.01                                     |
|                             |                                                  |                                                   |                                          |
| <b>Ni-supplemented diet</b> |                                                  |                                                   |                                          |
| 1-31                        | All ingredients #1-31                            |                                                   |                                          |
| 32                          | Nickel carbonate hydroxide, hexahydrate          | Harlan Laboratories                               | 0.0022                                   |
